# Supplementary material for: Chloroplast genome analyses and genomic resource development for epilithic sister genera Oresitrophe and Mukdenia (Saxifragaceae), using genome skimming data
Source: PubMed Central journal article supplement (PMC5885378; doi:10.1186/s12864-018-4633-x), 2018-04-04

A

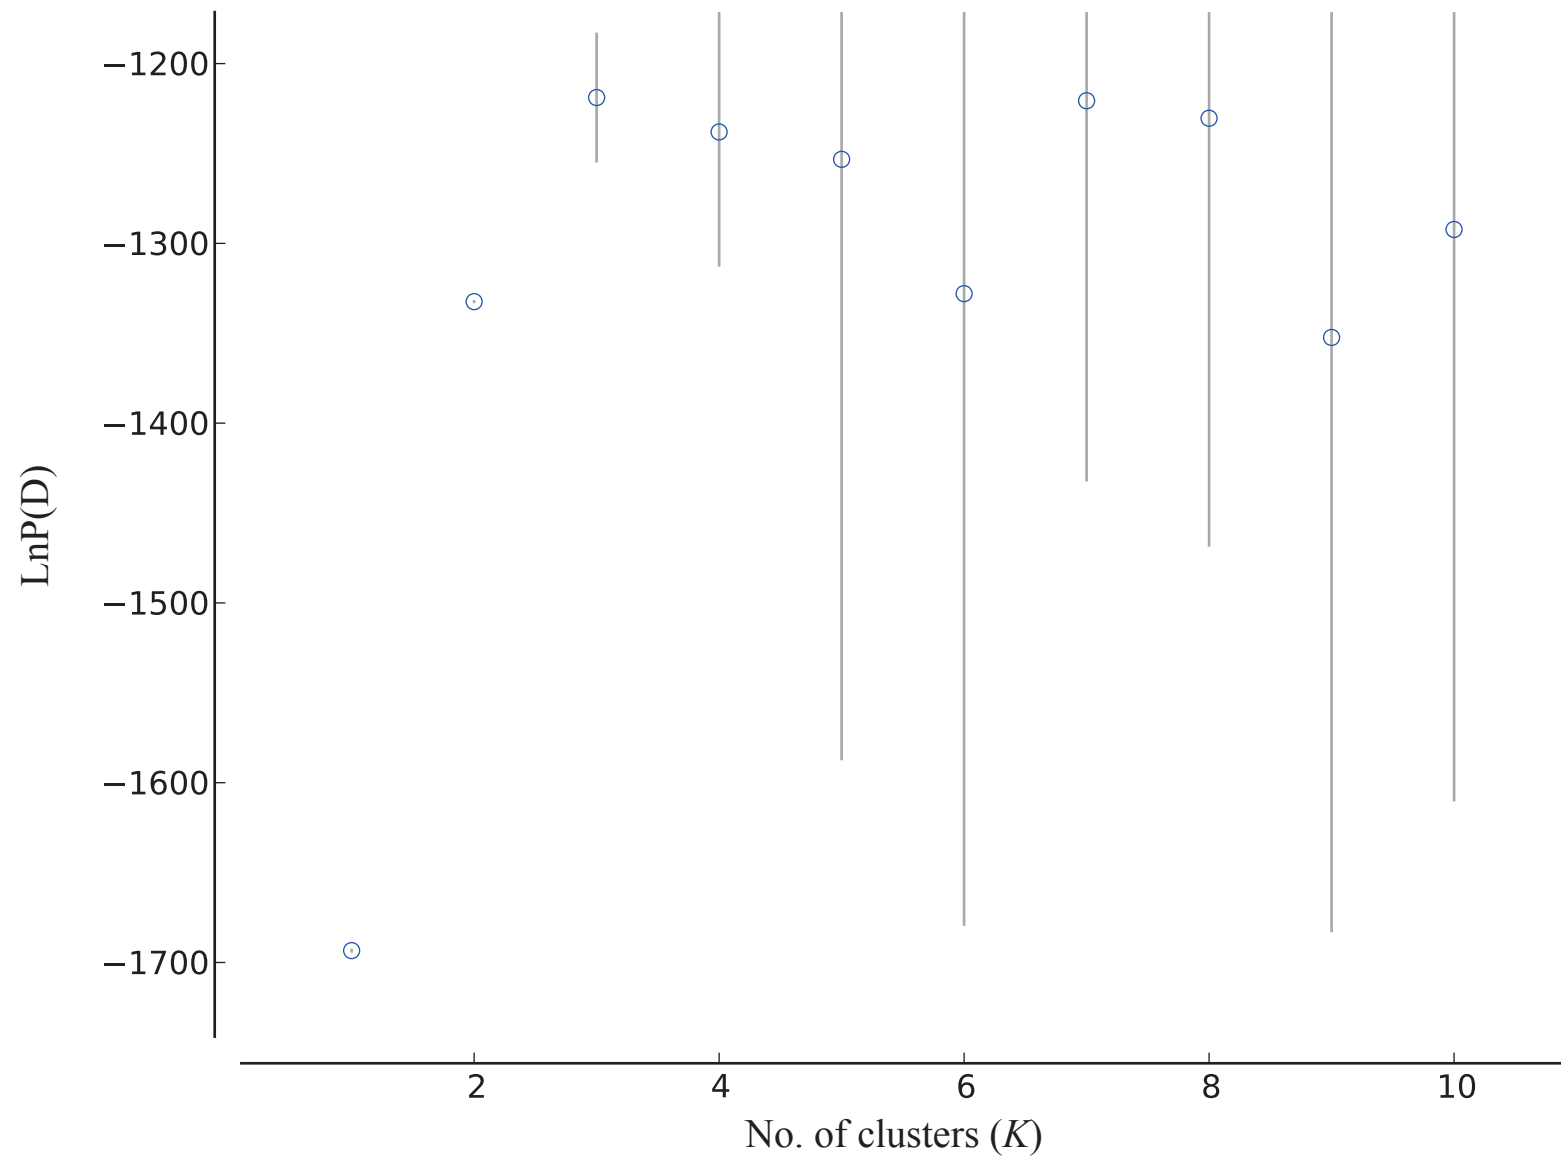

B

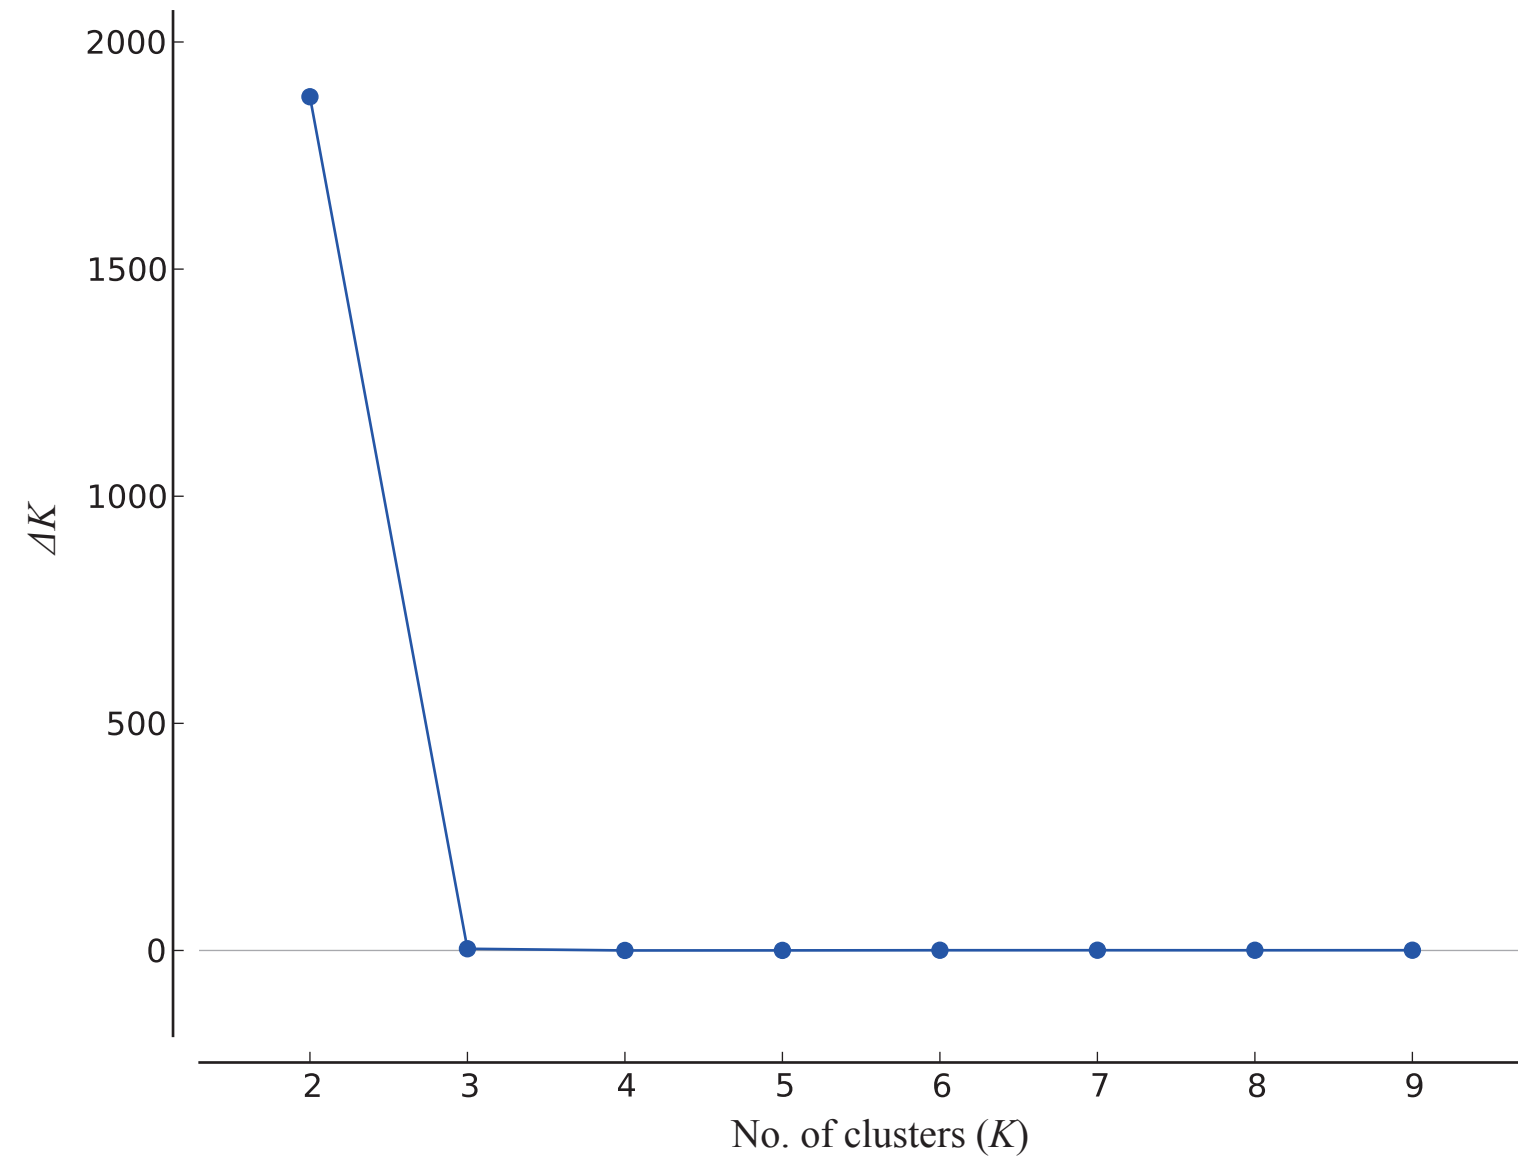

Supplement: 12864_2018_4633_MOESM5_ESM.pdf [file 12864_2018_4633_MOESM5_ESM.pdf]
